# Supplementary material
Source: Springer Nature journal article supplement (https://www.springermedizin.de/resource/supplementary/12876_2013_1241_MOESM3_ESM.pdf/9438306)

### ROC Curve-Mild

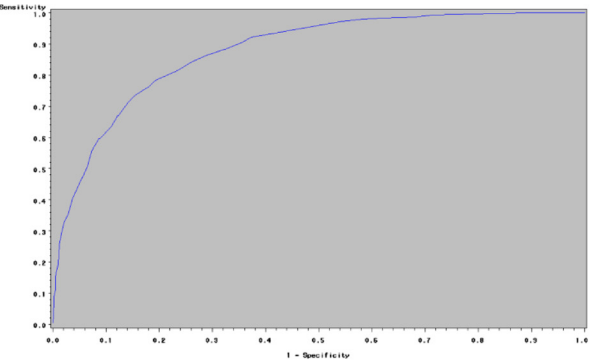

### ROC Curve-Severe

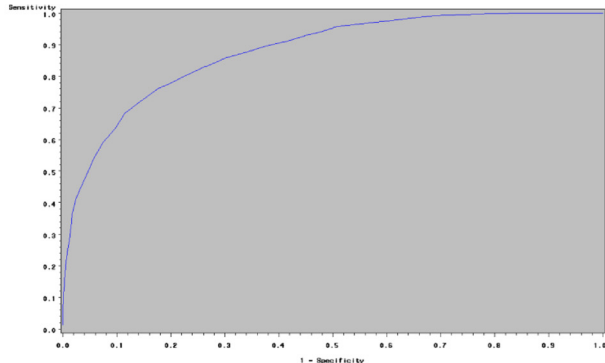

Supplement: MOESM3 [file 9438306]
